# Supplementary material for: New hydroxy-pyrazoline intermediates, subtle regio-selectivity and relative reaction rate variations observed during acid catalyzed and neutral pyrazole cyclization
Source: Royal Society of Chemistry journal article supplement (doi:10.1039/b500413f), 2005-01-01
Supplement: b500413f_a.pdf [file b500413f_a.pdf]

29 Mar 2005

|                        |                                                   |                                          |                   |
|------------------------|---------------------------------------------------|------------------------------------------|-------------------|
| Acquisition Time (sec) | 0.6652                                            | Comment                                  | 56448-114-3-clude |
| Date                   | Jan 26 2002                                       |                                          |                   |
| File Name              | Vains30VNMR\prd400\auto\0201\020126\3701 fid.vain | Vains30VNMR\prd400\auto\0201\020126\3701 |                   |
| Frequency (MHz)        | 100.53                                            | Nucleus                                  | <sup>13</sup> C   |
| Original Points Count  | 16384                                             | Points Count                             | 16384             |
| Solvent                | CHLOROFORM-D                                      |                                          |                   |
| Temperature (degree C) | 29.000                                            |                                          |                   |
|                        |                                                   | Number of Transients                     | 4096              |
|                        |                                                   | Pulse Sequence                           | s2put             |
|                        |                                                   | Sweep Width (Hz)                         | 24630.54          |

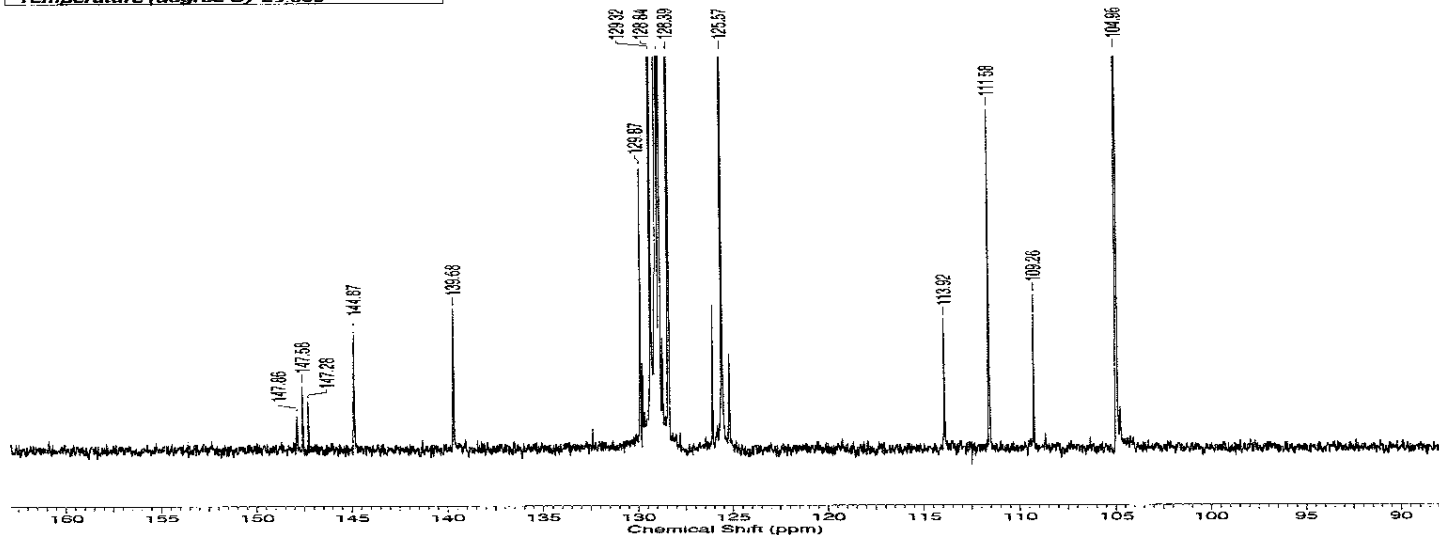

| No | (ppm)  | (Hz)    | Height |
|----|--------|---------|--------|
| 1  | 104.96 | 10551.1 | 0.2642 |
| 2  | 109.26 | 10984.1 | 0.0597 |
| 3  | 111.58 | 11217.1 | 0.1330 |
| 4  | 113.92 | 11451.6 | 0.0903 |
| 5  | 125.57 | 12622.8 | 0.6764 |
| 6  | 128.39 | 12906.9 | 0.2758 |
| 7  | 128.84 | 12952.0 | 0.9378 |
| 8  | 129.32 | 13000.1 | 1.0000 |
| 9  | 129.67 | 13055.8 | 0.1108 |
| 10 | 139.68 | 14042.0 | 0.0546 |
| 11 | 144.87 | 14563.7 | 0.0470 |
| 12 | 147.28 | 14805.8 | 0.0184 |
| 13 | 147.58 | 14835.8 | 0.0245 |
| 14 | 147.86 | 14864.4 | 0.0131 |
