# Supplementary figures and images for: New hydroxy-pyrazoline intermediates, subtle regio-selectivity and relative reaction rate variations observed during acid catalyzed and neutral pyrazole cyclization
Source: Royal Society of Chemistry journal article supplement (doi:10.1039/b500413f), 2005-01-01

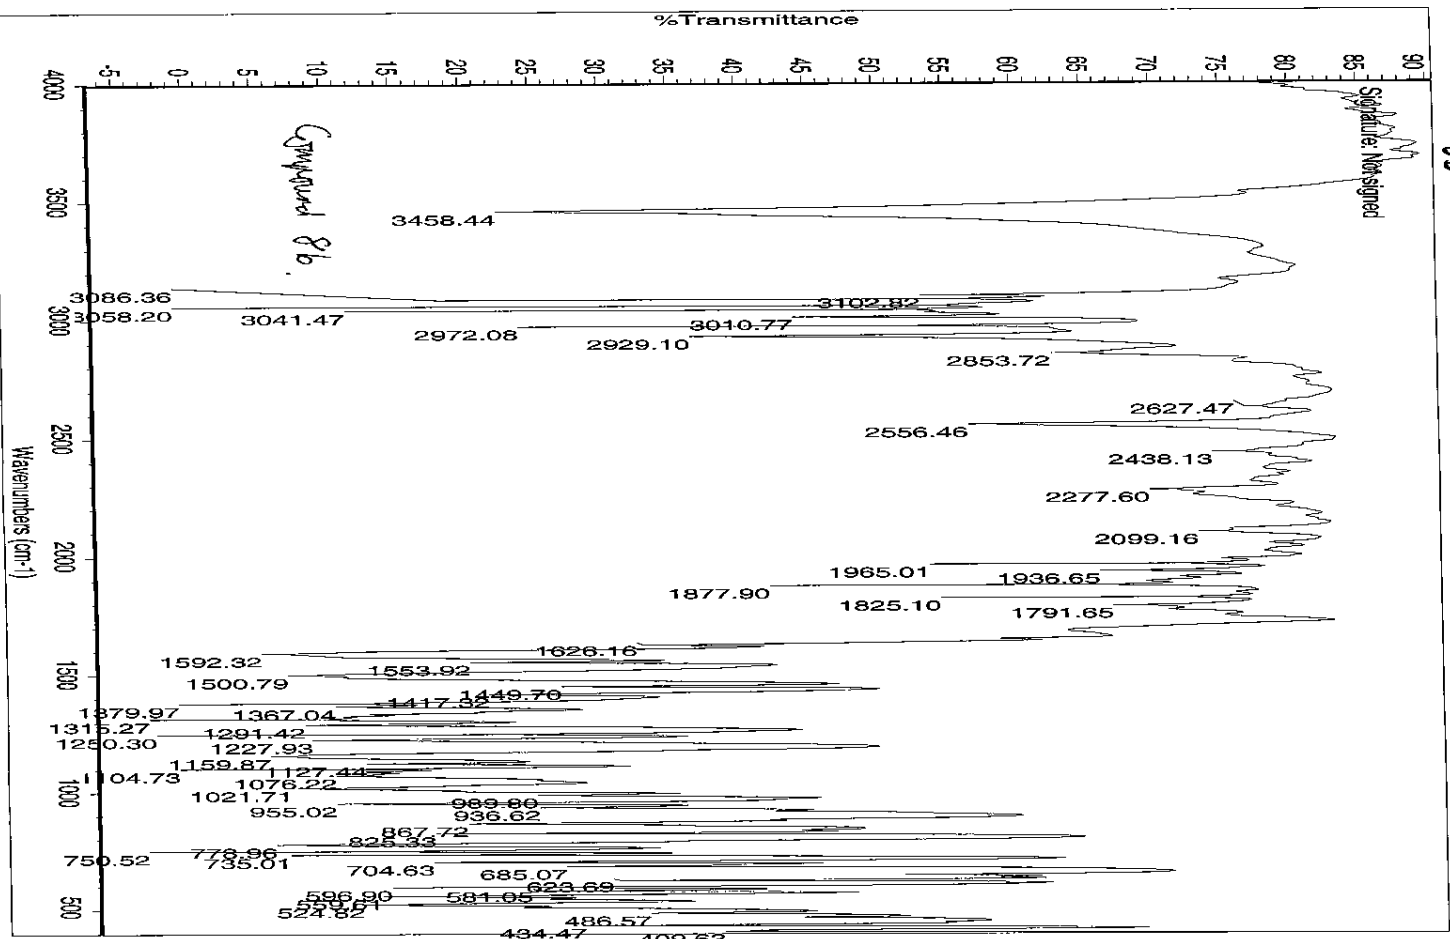

Supplement: b500413f_b.pdf [file b500413f_b.pdf]
